# Supplementary material for: Towards a Greener Approach for Biomass Valorization: Integration of Supercritical Fluid and Deep Eutectic Solvents
Source: MDPI journal article supplement (doi:10.3390/antibiotics12061031), 2023-06-08
Supplement: s1 [file s1]

## Supplementary material

**Table S1.** HPLC analysis of *Lavandula stoechas* extracts obtained with NADES. Results are expressed in µg/mL.

| Solvent                 | Material | Temperature (°C) | Ellagic acid                | Caffeic acid              | Ferulic acid               | Syringic acid             | Sinapic acid              | Rutin                       | Herniarin                  | Coumarin                   |
|-------------------------|----------|------------------|-----------------------------|---------------------------|----------------------------|---------------------------|---------------------------|-----------------------------|----------------------------|----------------------------|
| Betaine/ethylene glycol | residue  | 30               | 13.29 ± 1.01 <sup>d</sup>   | 6.29 ± 0.99 <sup>f</sup>  | 14.32 ± 1.55 <sup>c</sup>  | 12.62 ± 1.68 <sup>c</sup> | 34.37 ± 1.44 <sup>c</sup> | 234.97 ± 5.81 <sup>d</sup>  | 79.61 ± 4.84 <sup>c</sup>  | 0.27 ± 0.12 <sup>fg</sup>  |
|                         |          | 60               | 42.21 ± 2.63 <sup>a</sup>   | 4.75 ± 0.40 <sup>g</sup>  | 27.84 ± 0.60 <sup>a</sup>  | 12.58 ± 0.79 <sup>e</sup> | 39.46 ± 1.89 <sup>b</sup> | 438.93 ± 4.60 <sup>a</sup>  | 97.86 ± 1.86 <sup>b</sup>  | 0.59 ± 0.06 <sup>d</sup>   |
|                         | control  | 30               | 33.52 ± 2.71 <sup>b</sup>   | 3.47 ± 0.26 <sup>h</sup>  | 13.58 ± 0.58 <sup>c</sup>  | 8.52 ± 0.44 <sup>f</sup>  | 59.25 ± 3.68 <sup>a</sup> | 355.34 ± 5.68 <sup>b</sup>  | 81.35 ± 2.09 <sup>c</sup>  | 0.40 ± 0.00 <sup>e</sup>   |
|                         |          | 60               | 19.01 ± 0.41 <sup>c</sup>   | 9.58 ± 0.18 <sup>e</sup>  | 16.06 ± 0.21 <sup>b</sup>  | 12.67 ± 0.43 <sup>e</sup> | 33.92 ± 1.92 <sup>c</sup> | 348.37 ± 11.92 <sup>b</sup> | 43.40 ± 0.57 <sup>e</sup>  | 0.77 ± 0.01 <sup>c</sup>   |
| Betaine/glycerol        | residue  | 30               | 10.88 ± 0.31 <sup>def</sup> | 0.00 ± 0.00 <sup>k</sup>  | 2.42 ± 0.10 <sup>f-j</sup> | 0.00 ± 0.00 <sup>h</sup>  | 0.00 ± 0.00 <sup>d</sup>  | 72.89 ± 0.71 <sup>ij</sup>  | 8.20 ± 0.27 <sup>j</sup>   | 0.24 ± 0.01 <sup>f-i</sup> |
|                         |          | 60               | 12.24 ± 0.69 <sup>de</sup>  | 1.96 ± 0.03 <sup>ij</sup> | 2.82 ± 0.09 <sup>igh</sup> | 0.00 ± 0.00 <sup>h</sup>  | 0.00 ± 0.00 <sup>d</sup>  | 85.23 ± 3.00 <sup>ghi</sup> | 32.71 ± 0.29 <sup>f</sup>  | 0.12 ± 0.01 <sup>i</sup>   |
|                         | control  | 30               | 10.73 ± 0.44 <sup>def</sup> | 0.00 ± 0.00 <sup>k</sup>  | 2.94 ± 0.33 <sup>efg</sup> | 0.00 ± 0.00 <sup>h</sup>  | 0.00 ± 0.00 <sup>d</sup>  | 78.17 ± 1.57 <sup>hij</sup> | 18.17 ± 1.12 <sup>h</sup>  | 0.26 ± 0.00 <sup>fgh</sup> |
|                         |          | 60               | 8.97 ± 0.46 <sup>fgh</sup>  | 1.70 ± 0.04 <sup>ij</sup> | 3.36 ± 0.29 <sup>def</sup> | 0.00 ± 0.00 <sup>h</sup>  | 0.00 ± 0.00 <sup>d</sup>  | 93.29 ± 1.20 <sup>g</sup>   | 9.35 ± 0.12 <sup>j</sup>   | 0.27 ± 0.01 <sup>fg</sup>  |
| Glycerol/glucose        | residue  | 30               | 7.97 ± 0.07 <sup>fgh</sup>  | 0.00 ± 0.00 <sup>k</sup>  | 2.62 ± 0.19 <sup>f-i</sup> | 0.00 ± 0.00 <sup>h</sup>  | 0.00 ± 0.00 <sup>d</sup>  | 85.53 ± 1.30 <sup>ghi</sup> | 6.05 ± 0.09 <sup>i</sup>   | 0.26 ± 0.02 <sup>fgh</sup> |
|                         |          | 60               | 13.50 ± 0.96 <sup>d</sup>   | 1.26 ± 0.31 <sup>j</sup>  | 4.17 ± 0.21 <sup>de</sup>  | 0.00 ± 0.00 <sup>h</sup>  | 0.00 ± 0.00 <sup>d</sup>  | 110.02 ± 5.75 <sup>ef</sup> | 31.10 ± 0.44 <sup>fg</sup> | 0.12 ± 0.01 <sup>i</sup>   |
|                         | control  | 30               | 9.49 ± 0.66 <sup>efg</sup>  | 0.00 ± 0.00 <sup>k</sup>  | 3.22 ± 0.30 <sup>def</sup> | 0.00 ± 0.00 <sup>h</sup>  | 0.00 ± 0.00 <sup>d</sup>  | 88.53 ± 3.97 <sup>gh</sup>  | 5.63 ± 0.19 <sup>j</sup>   | 0.30 ± 0.00 <sup>efg</sup> |
|                         |          | 60               | 10.75 ± 1.10 <sup>def</sup> | 2.11 ± 0.07 <sup>ij</sup> | 4.36 ± 0.17 <sup>d</sup>   | 0.00 ± 0.00 <sup>h</sup>  | 0.00 ± 0.00 <sup>d</sup>  | 120.36 ± 1.31 <sup>e</sup>  | 7.46 ± 0.07 <sup>j</sup>   | 0.31 ± 0.01 <sup>ef</sup>  |
| Ethanol                 | residue  | 30               | 6.59 ± 0.03 <sup>gh</sup>   | 1.72 ± 0.00 <sup>ij</sup> | 1.25 ± 0.04 <sup>kl</sup>  | 0.00 ± 0.00 <sup>h</sup>  | 0.00 ± 0.00 <sup>d</sup>  | 0.00 ± 0.00 <sup>l</sup>    | 19.92 ± 0.05 <sup>h</sup>  | 0.14 ± 0.01 <sup>hi</sup>  |
|                         |          | 60               | 7.15 ± 0.24 <sup>gh</sup>   | 2.41 ± 0.26 <sup>i</sup>  | 1.12 ± 0.11 <sup>kl</sup>  | 4.75 ± 0.32 <sup>g</sup>  | 0.00 ± 0.00 <sup>d</sup>  | 68.54 ± 2.75 <sup>jk</sup>  | 21.28 ± 0.07 <sup>h</sup>  | 0.13 ± 0.04 <sup>i</sup>   |
|                         | control  | 30               | 6.04 ± 0.10 <sup>h</sup>    | 0.00 ± 0.00 <sup>k</sup>  | 0.00 ± 0.00 <sup>l</sup>   | 0.00 ± 0.00 <sup>h</sup>  | 0.00 ± 0.00 <sup>d</sup>  | 55.53 ± 1.99 <sup>k</sup>   | 12.52 ± 0.27 <sup>i</sup>  | 0.42 ± 0.02 <sup>e</sup>   |
|                         |          | 60               | 7.79 ± 0.03 <sup>fgh</sup>  | 1.55 ± 0.06 <sup>ij</sup> | 1.48 ± 0.10 <sup>ijk</sup> | 4.06 ± 0.04 <sup>g</sup>  | 0.00 ± 0.00 <sup>d</sup>  | 72.48 ± 1.94 <sup>ij</sup>  | 29.71 ± 0.22 <sup>fg</sup> | 0.19 ± 0.01 <sup>ghi</sup> |
| Water                   | residue  | 30               | 10.39 ± 0.43 <sup>def</sup> | 40.64 ± 0.16 <sup>a</sup> | 1.64 ± 0.12 <sup>g-k</sup> | 33.92 ± 1.19 <sup>c</sup> | 32.68 ± 0.16 <sup>c</sup> | 96.72 ± 8.66 <sup>fg</sup>  | 55.01 ± 0.11 <sup>d</sup>  | 1.06 ± 0.00 <sup>a</sup>   |
|                         |          | 60               | 16.93 ± 1.02 <sup>c</sup>   | 23.72 ± 0.62 <sup>c</sup> | 0.95 ± 0.06 <sup>kl</sup>  | 28.07 ± 2.15 <sup>d</sup> | 33.08 ± 0.13 <sup>c</sup> | 257.48 ± 1.09 <sup>c</sup>  | 128.67 ± 1.71 <sup>a</sup> | 0.90 ± 0.03 <sup>b</sup>   |
|                         | control  | 30               | 13.16 ± 1.14 <sup>d</sup>   | 28.09 ± 0.06 <sup>b</sup> | 1.52 ± 0.11 <sup>h-k</sup> | 47.81 ± 2.71 <sup>a</sup> | 33.03 ± 0.17 <sup>c</sup> | 67.19 ± 0.71 <sup>jk</sup>  | 27.48 ± 2.66 <sup>g</sup>  | 1.09 ± 0.09 <sup>a</sup>   |
|                         |          | 60               | 12.90 ± 0.12 <sup>d</sup>   | 20.82 ± 0.06 <sup>d</sup> | 0.82 ± 0.04 <sup>kl</sup>  | 39.75 ± 0.32 <sup>b</sup> | 31.78 ± 0.19 <sup>c</sup> | 118.54 ± 0.75 <sup>e</sup>  | 52.48 ± 2.66 <sup>d</sup>  | 0.85 ± 0.00 <sup>bc</sup>  |

Data are expressed as the mean ± standard deviation (n = 20). Different letters (a–h) in the same column indicate statistical differences at the 0.05 ( $p < 0.05$ ).
